# Supplementary figures and images for: Computer simulation studies on passive recruitment dynamics of lipids induced by the adsorption of charged nanoparticles
Source: Royal Society of Chemistry journal article supplement (doi:10.1039/c4cp00553h), 2014-01-01

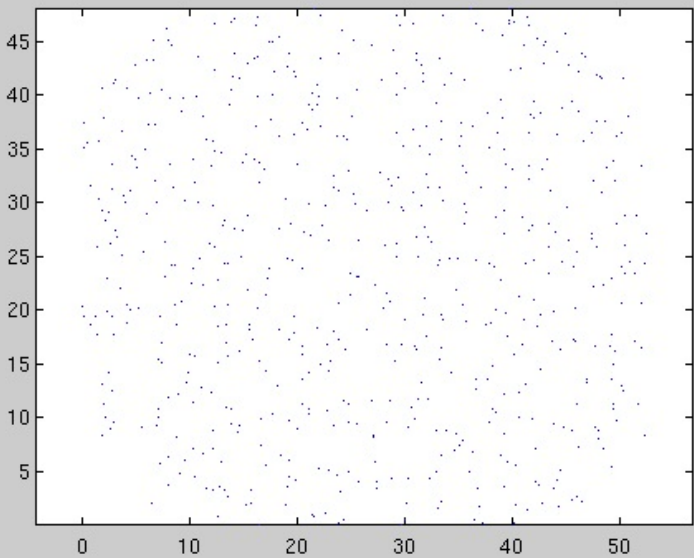

Supplement: c4cp00553h2.pdf [file c4cp00553h2.pdf]
